# Supplementary material for: On the genetic basis of tail-loss evolution in humans and apes
Source: PubMed Central journal article supplement (PMC10901737; doi:10.1038/s41586-024-07095-8), 2024-02-28
Supplement: 41586_2024_7095_MOESM1_ESM.pdf [file 41586_2024_7095_MOESM1_ESM.pdf]

**Supplementary information**

---

**On the genetic basis of tail-loss evolution in humans and apes**

---

In the format provided by the authors and unedited

## Supplementary Tables

**Supplementary Table 1. RT-PCR primer sequences.**

| RT-PCR Target sites         | Orientation | Sequence                   |
|-----------------------------|-------------|----------------------------|
| Human <i>TBXT</i> : exon 8  | F           | CCTCATAGCCTCATGGACACCTG    |
|                             | R           | TCTTAACCTGAGACTGCCACTGG    |
| Human <i>TBXT</i> : exon3-8 | F           | GGTGACTGCTTATCAGAACGAGGAG  |
|                             | R           | TACTGAGGCTGCATTTCTTCTTAACC |
| Human <i>TBXT</i> : exon4-7 | F           | CAGAACGAGGAGATCACAGCTC     |
|                             | R           | GGTACTGACTGGAGCTGGTAGG     |
| Human <i>MIXL1</i>          | F           | GGCGTCAGAGTGGGAAATCC       |
|                             | R           | GGCAGGCAGTTCACATCTACC      |
| Human <i>ACTB1</i>          | F           | CACCATTGGCAATGAGCGGTTC     |
|                             | R           | AGGTCTTTGCGGATGTCCACGT     |
| Mouse <i>Tbxt</i> : exon4-7 | F           | CCAGAATGAGGAGATTACAGCCCT   |
|                             | R           | GGATACTGGCTAGAGCCAGTAGG    |
| Mouse <i>Actb1</i>          | F           | CATTGCTGACAGGATGCAGAAGG    |
|                             | R           | TGCTGGAAGGTGGACAGTGAGG     |

**Supplementary Table 2. CRISPR targeting sites and guide RNA sequences.**

| Targeting purposes                                     | PAM | Guide RNA sequence    | Locus (hg38/mm10)        |
|--------------------------------------------------------|-----|-----------------------|--------------------------|
| Delete <i>AluY</i> in human <i>TBXT</i>                | TGG | AGACTGTGCCCACTCTCGGG  | chr6:166161988-166162010 |
|                                                        | TGG | GATAGACCATAAAGATCCCC  | chr6:166161557-166161579 |
| Delete <i>AluSx1</i> in human <i>TBXT</i>              | GGG | CACAGTAGTTGTCCCGCTAG  | chr6:166163730-166163752 |
|                                                        | AGG | GAATGGGGGGAGCTTAAACC  | chr6:166163290-166163312 |
| Delete <i>Tbxt</i> -exon6 in mouse <i>Tbxt</i>         | TGG | ATTTTCGGTTCTGCAGACCGG | chr17:8438362-8438384    |
|                                                        | GGG | CAAGATGCTGGTTGAACCAG  | chr17:8438920-8438942    |
| Insert <i>AluSx1</i> into mouse <i>Tbxt</i> intron 5   | GGG | CTACCCGATGAGCCACAATA  | chr17:8437898-8437920    |
| Insert <i>AluY/RCS</i> into mouse <i>Tbxt</i> intron 6 | TGG | TAGAACTCAAGCCCTTAGTG  | chr17:8439161-8439183    |

**Supplementary Table 3. Long DNA oligos used in CRISPR/Cas9-mediated DNA deletion experiments.** Target sites correspond to the CRISPR targeting purposes indicated in Supplementary Table 1.

|                                                |                                                                                                                                       |
|------------------------------------------------|---------------------------------------------------------------------------------------------------------------------------------------|
| Delete <i>AluY</i> in human <i>TBXT</i>        | A*C*T*ACACCAGTGATTCTCCAAATACGGTGCCAGGCCAGAGCCTCAGCA<br>CCACCC CCCTGGCCTAATTCTCTCTATAACACTGTATATGTCTAGACTTAATT<br>TTGTC*T*G*G          |
| Delete <i>AluSx1</i> in human <i>TBXT</i>      | C*A*G*TGCTGCCTGGAGAATTGTTAGTAGTTTTGGAAATTGAAGCCACAGTA<br>GTTGTCCCGC ACCAGGAGAGTGAGCAGTAAAGGGTCTACCCCCAGCTA<br>GGAAGGCACCTCCCGTC*T*C*T |
| Delete <i>Tbxt</i> -exon6 in mouse <i>Tbxt</i> | T*T*T*ATTCTAGAGCCCATTAACATATCACTCCTGCTCACTTGGTAGAAAGCC<br>ACCG CAGGGGTCCCCAAGGAGGCTTTCAATTCATATCCATGTGCCTCAG<br>AACATG*C*C*C          |

Note: “|” indicates a junction site; “\*” indicates phosphorothioate bond modification sites.

**Supplementary Table 4. Genotyping PCR primer sequences.**

| PCR Target sites                                                 | Orientation | Sequence                             |
|------------------------------------------------------------------|-------------|--------------------------------------|
| Delete human <i>TBXT-AluY</i> :<br>read through                  | F           | CAGCCAGGCTCAAGAATTCC                 |
|                                                                  | R           | GACTTCCTAACCCAATAAGGTCC              |
| Delete human <i>TBXT-AluY</i> :<br>left junction                 | F           | CAGCCAGGCTCAAGAATTCC                 |
|                                                                  | R           | GTGTTCCCTAATATTGGAGCATGC             |
| Delete human <i>TBXT-AluSx1</i> :<br>read through                | F           | TCCTAGGCTGATTGAACAACCAG              |
|                                                                  | R           | CAAGGCAGGTGAGCTTTCC                  |
| Delete human <i>TBXT-AluSx1</i> :<br>left junction               | F           | TCCTAGGCTGATTGAACAACCAG              |
|                                                                  | R           | TTAAGCTCCCCCATTCC                    |
| Delete mouse <i>Tbxt-exon6</i> :<br>read through                 | F           | GCAGTCTGAGTCCTACCTGTG                |
|                                                                  | R           | TGTCAGTCTGGTTCTACACCTGGAGAGTCTTTGATC |
| Delete mouse <i>Tbxt-exon6</i> :<br>left junction                | F           | GCAGTCTGAGTCCTACCTGTG                |
|                                                                  | R           | GTACAGGACCTACTTGGAGAGC               |
| Delete mouse <i>Tbxt-exon6</i> :<br>right junction               | F           | GACAGGACTGAGTCTCAAGC                 |
|                                                                  | R           | TGTCAGTCTGGTTCTACACCTGGAGAGTCTTTGATC |
| Insert <i>AluSx1</i> in mouse <i>Tbxt</i> :<br>read through      | F           | CTCTGTCCCTAAACAATGATCAGG             |
|                                                                  | R           | GACTACCCGATACAATACTTGAGAC            |
| Insert <i>AluY/RCS</i> in mouse<br><i>Tbxt</i> :<br>read through | F           | TGGAGCCGTGGTTTGATGAAC                |
|                                                                  | R           | CAGACAAAGGTTGGTCTAAACAGAC            |
